# Supplementary material
Source: publisher figshare collection journal article supplement (https://tandf.figshare.com/ndownloader/files/16870613)
Supplement: Supplementary file 1 [file 16870613]

Supplemental Information for

Re-aerosolization in Liquid-based Air Samplers Induces Bias in Bacterial Diversity

Joanie Lemieuxab, Marc Veilletteb, Hamza Mbarecheab and Caroline Duchaineab

a.Département de biochimie, de microbiologie et de bio-informatique, Faculté des sciences et de génie, Université Laval, Quebec City (Qc), Canada

b.Centre de recherche de l’Institut universitaire de cardiologie et pneumologie de Québec, Quebec City (Qc), Canada.


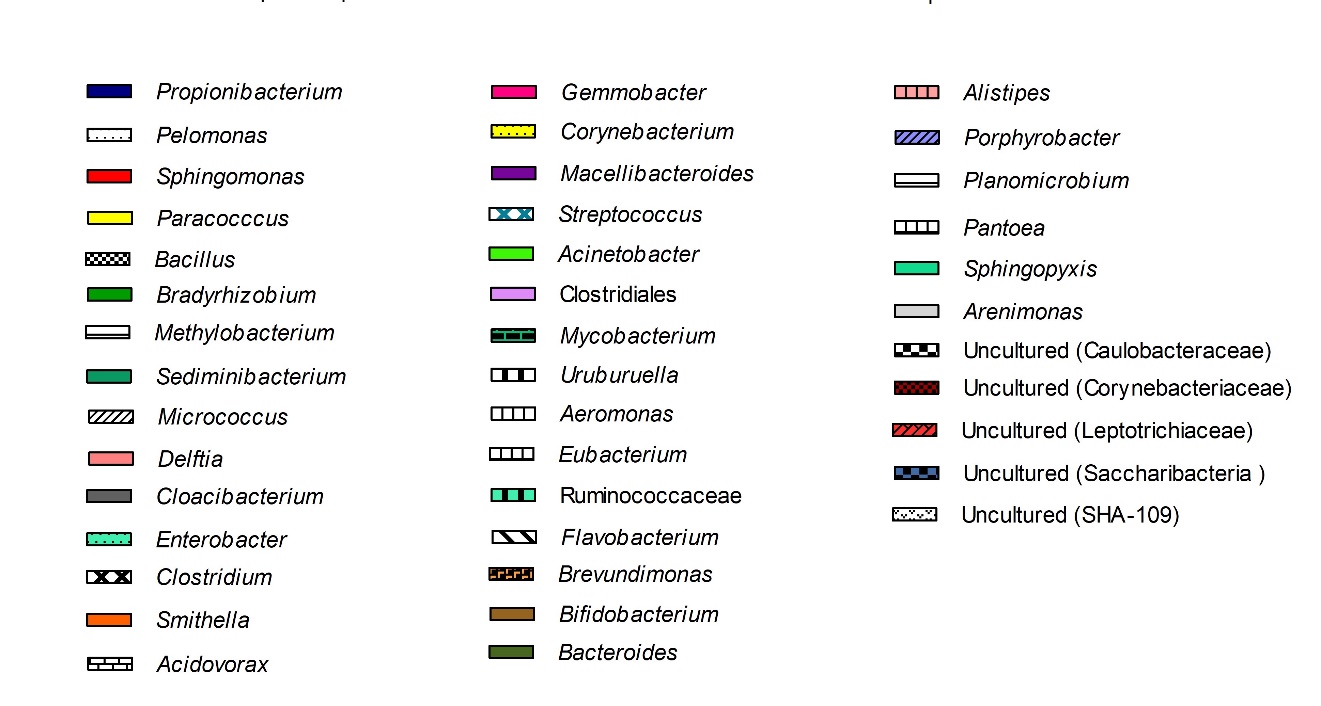


Figure S1 - The 20 most abundant genera collected with the air samplers used in this study.
